# Supplementary material for: Methodology for elemental analysis of a mineral fertilizer, some of its raw materials and limestone using microwave-induced plasma optical emission spectrometry (MIP OES)
Source: Royal Society of Chemistry journal article supplement (doi:10.1039/d0ay00459f), 2020-01-01
Supplement: d0ay00459f1.pdf [file d0ay00459f1.pdf]

## Supplementary Information

### **Methodology for elemental analysis of mineral fertilizer, some of its raw materials and limestone using microwave-induced plasma optical emission spectrometry (MIP OES)**

*Alexandre Müller<sup>a</sup>, Dirce Pozebon<sup>a</sup>, Anderson Schwingel, Ribeiro<sup>b</sup>*

*<sup>a</sup> Universidade Federal do Rio Grande do Sul, Instituto de Química, Av. Bento Gonçalves 9500, Porto Alegre, RS, Brazil*

*<sup>b</sup> Universidade Federal de Pelotas, Centro de Ciências Químicas, Farmacêuticas e de Alimentos, Capão do Leão, RS, Brazil*

**Table S1.** Analytical parameters and data related with the spectral lines evaluated; those marked with asterisk were selected.

| Element   | Spectral Line, nm | Excitation Energy, eV | State              | LOD, $\mu\text{g L}^{-1}$ | LOQ, $\mu\text{g L}^{-1}$ | Sample Flow Rate, $\text{mL min}^{-1}$ | Integration Time, s | Calibration Curve Equation | R        |
|-----------|-------------------|-----------------------|--------------------|---------------------------|---------------------------|----------------------------------------|---------------------|----------------------------|----------|
| <b>Ag</b> | 328.068*          | 3.78                  | Atomic             | 0.4                       | 1.3                       | 1.54                                   | 3                   | Linear                     | 0.9999   |
|           | 338.289           | 3.66                  | Atomic             | 2                         | 6.4                       | 1.54                                   | 3                   | Linear                     | 0.9999   |
|           | 546.549           | 2.27                  | Atomic             | -                         | -                         | 2.31                                   | 10                  | Linear                     | < 0.9    |
| <b>Al</b> | 396.152           | 3.13                  | Atomic             | 0.5                       | 1.3                       | 1.54                                   | 5                   | Quadratic                  | 0.9983   |
|           | 394.401*          | 3.14                  | Atomic             | 0.4                       | 1.1                       | 1.54                                   | 3                   | Quadratic                  | 0.9992   |
|           | 309.271           | 4.01                  | Atomic             | 13                        | 43                        | 2.31                                   | 5                   | Quadratic                  | 0.9999   |
| <b>B</b>  | 249.772*          | 4.96                  | Atomic             | 13                        | 43                        | 2.31                                   | 10                  | Linear                     | 0.9997   |
|           | 249.677           | 4.96                  | Atomic             | 24                        | 82                        | 2.31                                   | 20                  | Linear                     | 0.9998   |
|           | 208.957           | 5.93                  | Atomic             | 42                        | 139                       | 0.79                                   | 20                  | Linear                     | 0.9999   |
| <b>Ba</b> | 455.403           | 7.93                  | Ionic <sup>a</sup> | 0.2                       | 0.77                      | 1.54                                   | 3                   | Linear                     | 0.9995   |
|           | 493.408           | 7.72                  | Ionic <sup>a</sup> | 0.2                       | 0.67                      | 1.54                                   | 3                   | Linear                     | 0.9997   |
|           | 614.171*          | 7.23                  | Ionic <sup>a</sup> | 0.2                       | 0.57                      | 1.54                                   | 3                   | Linear                     | 0.9996   |
| <b>Be</b> | 234.861*          | 5.28                  | Atomic             | 1                         | 3.5                       | 1.54                                   | 3                   | Linear                     | 0.9999   |
|           | 313.042           | 13.28                 | Ionic <sup>a</sup> | -                         | -                         | 1.54                                   | 3                   | Quadratic                  | < 0.9000 |
|           | 313.107           | 13.28                 | Ionic <sup>a</sup> | 107                       | 357                       | 1.54                                   | 3                   | Linear                     | 0.9983   |
| <b>Ca</b> | 393.366*          | 9.26                  | Ionic <sup>a</sup> | 0.06                      | 0.19                      | 0.79                                   | 3                   | Linear                     | 0.9998   |
|           | 396.847           | 9.23                  | Ionic <sup>a</sup> | 0.1                       | 0.40                      | 2.31                                   | 3                   | Linear                     | 0.9994   |

Tble S1 Continued

|           |          |       |                    |      |       |      |    |           |        |
|-----------|----------|-------|--------------------|------|-------|------|----|-----------|--------|
|           | 422.673  | 2.93  | Atomic             | 0.1  | 0.46  | 2.31 | 5  | Linear    | 0.9995 |
| <b>Cd</b> | 228.802* | 5.42  | Atomic             | 10   | 34    | 1.54 | 5  | Linear    | 0.9999 |
|           | 226.502  | 14.46 | Ionic <sup>a</sup> | -    | -     | 1.54 | 5  | Linear    | 0.9873 |
|           | 214.439  | 14.77 | Ionic <sup>a</sup> | 17   | 31    | 2.31 | 10 | Quadratic | 0.9868 |
| <b>Co</b> | 340.512  | 3.64  | Atomic             | 8    | 16    | 0.79 | 3  | Quadratic | 0.9843 |
|           | 345.351* | 3.59  | Atomic             | 2    | 5.2   | 0.79 | 3  | Linear    | 0.9999 |
|           | 350.228  | 3.54  | Atomic             | 6    | 16    | 2.31 | 10 | Quadratic | 0.9941 |
| <b>Cr</b> | 425.433* | 2.91  | Atomic             | 0.08 | 0.27  | 2.31 | 5  | Linear    | 0.9997 |
|           | 357.868  | 3.46  | Atomic             | 0.5  | 1.1   | 1.54 | 3  | Quadratic | 0.9999 |
|           | 427.480  | 2.90  | Atomic             | 0.10 | 0.33  | 2.31 | 10 | Linear    | 0.9999 |
| <b>Cu</b> | 324.754* | 3.82  | Atomic             | 2    | 8.2   | 0.79 | 3  | Linear    | 0.9995 |
|           | 327.395  | 3.78  | Atomic             | 3    | 5.4   | 2.31 | 5  | Quadratic | 0.9985 |
|           | 510.554  | 2.43  | Atomic             | 4    | 12    | 1.54 | 3  | Linear    | 0.9977 |
| <b>Fe</b> | 385.991* | 3.21  | Atomic             | 0.6  | 1.99  | 1.54 | 10 | Linear    | 0.9998 |
|           | 373.713  | 3.32  | Atomic             | 8    | 26.93 | 2.31 | 3  | Linear    | 0.9953 |
|           | 358.119  | 3.46  | Atomic             | 5    | 15.23 | 1.54 | 10 | Linear    | 0.9999 |
| <b>K</b>  | 766.491* | 1.62  | Atomic             | 0.1  | 0.47  | 0.79 | 3  | Linear    | 0.9998 |
|           | 769.897  | 1.61  | Atomic             | 0.4  | 1.34  | 1.54 | 3  | Linear    | 0.9996 |
|           | 404.414  | 3.06  | Atomic             | -    | -     | 2.31 | 5  | Linear    | < 0.9  |

Tble S1 Continued

|           |          |       |                    |      |       |      |    |           |         |
|-----------|----------|-------|--------------------|------|-------|------|----|-----------|---------|
| <b>La</b> | 394.910  | 8.72  | Ionic <sup>a</sup> | 3    | 8.0   | 2.31 | 10 | Quadratic | 0.9930  |
|           | 408.672  | 8.61  | Ionic <sup>a</sup> | 1    | 3.6   | 0.79 | 3  | Linear    | 1.000   |
|           | 433.374* | 8.44  | Ionic <sup>a</sup> | 0.3  | 0.95  | 0.79 | 3  | Linear    | 1.000   |
| <b>Li</b> | 670.784* | 1.85  | Atomic             | 0.03 | 0.08  | 2.31 | 5  | Linear    | 0.9997  |
|           | 610.365  | 2.03  | Atomic             | 0.2  | 0.72  | 1.54 | 10 | Linear    | 0.9999  |
|           | 460.289  | 2.69  | Atomic             | 7    | 21.78 | 0.79 | 3  | Linear    | 0.9992  |
| <b>Mg</b> | 285.213  | 4.35  | Atomic             | 1    | 4.25  | 1.54 | 3  | Linear    | 0.9999  |
|           | 280.271* | 12.07 | Ionic <sup>a</sup> | 0.3  | 0.86  | 0.79 | 10 | Linear    | 0.9996  |
|           | 279.553  | 12.08 | Ionic <sup>a</sup> | 0.4  | 1.24  | 1.54 | 3  | Linear    | 0.9999  |
| <b>Mn</b> | 403.076  | 3.08  | Atomic             | 0.3  | 1.1   | 0.79 | 3  | Linear    | 0.9992  |
|           | 403.307* | 3.07  | Atomic             | 0.2  | 0.56  | 0.79 | 3  | Linear    | 1.000   |
|           | 257.610  | 12.24 | Ionic <sup>a</sup> | 16   | 55    | 0.79 | 5  | Linear    | 0.9978  |
| <b>Ni</b> | 352.454  | 3.52  | Atomic             | 17   | 41    | 2.31 | 5  | Quadratic | 0.9998  |
|           | 352.454  | 3.52  | Atomic             | 17   | 41    | 2.31 | 5  | Quadratic | 0.9997  |
|           | 361.939* | 3.42  | Atomic             | 2    | 5.3   | 0.79 | 3  | Quadratic | 0.99988 |
| <b>Na</b> | 588.995* | 2.10  | Atomic             | 0.5  | 1.7   | 0.79 | 3  | Linear    | 0.9997  |
|           | 589.592  | 2.10  | Atomic             | -    | -     | 1.54 | 3  | Linear    | < 0.9   |
|           | 330.237  | 3.75  | Atomic             | -    | -     | 1.54 | 3  | Linear    | < 0.9   |

Tble S1 Continued

|           |          |       |                    |      |       |      |    |           |        |
|-----------|----------|-------|--------------------|------|-------|------|----|-----------|--------|
| <b>Pb</b> | 405.781  | 3.05  | Atomic             | 35   | 117   | 2.31 | 10 | Linear    | 0.9959 |
|           | 283.305  | 4.38  | Atomic             | 99   | 329   | 2.31 | 10 | Linear    | 0.9161 |
|           | 363.957* | 3.41  | Atomic             | 3    | 10    | 0.79 | 10 | Linear    | 0.9974 |
| <b>Sr</b> | 407.771* | 8.73  | Ionic <sup>a</sup> | 0.01 | 0.033 | 0.79 | 3  | Linear    | 1.0000 |
|           | 421.552  | 8.63  | Ionic <sup>a</sup> | 0.1  | 0.24  | 1.54 | 3  | Linear    | 0.9998 |
|           | 460.733  | 2.69  | Atomic             | 0.1  | 0.20  | 1.54 | 10 | Linear    | 0.9998 |
| <b>Tl</b> | 535.046* | 2.32  | Atomic             | 1    | 3.9   | 0.79 | 3  | Linear    | 0.9996 |
|           | 377.572  | 3.28  | Atomic             | -    | -     | 2.31 | 5  | Linear    | < 0.9  |
|           | 351.924  | 3.52  | Atomic             | -    | -     | 0.79 | 3  | Linear    | < 0.9  |
| <b>V</b>  | 309.311  | 10.76 | Ionic <sup>a</sup> | 4    | 15    | 2.31 | 5  | Quadratic | 0.9905 |
|           | 437.923* | 2.83  | Atomic             | 0.2  | 0.61  | 1.54 | 3  | Linear    | 0.9999 |
|           | 310.230  | 12.76 | Ionic <sup>a</sup> | 80   | 266   | 2.31 | 5  | Linear    | 0.9862 |
| <b>Zn</b> | 213.857* | 5.80  | Atomic             | 15   | 50    | 2.31 | 10 | Linear    | 0.9996 |
|           | 481.053  | 2.58  | Atomic             | 7    | 20    | 1.54 | 3  | Quadratic | 0.9967 |
|           | 202.548  | 15.51 | Ionic <sup>a</sup> | 10   | 33    | 0.79 | 10 | Quadratic | 0.9633 |

<sup>a</sup>: total energy (ionization + excitation)

**Table S2.** Multi-nutrient (SRM 695) analysis results (mean  $\pm$  standard deviation for 3 replicates); US: ultrasonic assisted extraction, MAD: microwave assisted digestion, MP: heating on metallic plate.

| Element | Certified           | Unit                | Found             |                   |                   | Average Recovery, % |     |     |
|---------|---------------------|---------------------|-------------------|-------------------|-------------------|---------------------|-----|-----|
|         |                     |                     | US                | MAD               | MP                | US                  | MAD | MP  |
| Al      | (0.61 $\pm$ 0.03)   | %                   | 0.61 $\pm$ 0.03   | 0.59 $\pm$ 0.06   | 0.49 $\pm$ 0.02   | 100                 | 96  | 80  |
| B       | (0.111 $\pm$ 0.002) | %                   | -                 | 0.117 $\pm$ 0.050 | 0.062 $\pm$ 0.002 | -                   | 105 | 56  |
| Ca      | 2.26 $\pm$ 0.04     | %                   | 2.38 $\pm$ 0.04   | 2.20 $\pm$ 0.04   | 2.29 $\pm$ 0.04   | 106                 | 97  | 101 |
| Cd      | 16.9 $\pm$ 0.2      | mg kg <sup>-1</sup> | 16.2 $\pm$ 0.4    | 17.5 $\pm$ 0.6    | nd                | 96                  | 103 | -   |
| Co      | 65.3 $\pm$ 2.4      | mg kg <sup>-1</sup> | 68.4 $\pm$ 7.9    | 77.6 $\pm$ 10.6   | 57.1 $\pm$ 5.4    | 105                 | 119 | 87  |
| Cr      | 244 $\pm$ 6         | mg kg <sup>-1</sup> | 240 $\pm$ 0.5     | 253 $\pm$ 12      | 248 $\pm$ 10      | 98                  | 104 | 102 |
| Cu      | 1225 $\pm$ 9        | mg kg <sup>-1</sup> | 1265 $\pm$ 46     | 1231 $\pm$ 32     | 1239 $\pm$ 59     | 103                 | 100 | 101 |
| Fe      | 3.99 $\pm$ 0.08     | %                   | 3.63 $\pm$ 0.10   | 3.99 $\pm$ 0.08   | 3.95 $\pm$ 0.02   | 91                  | 100 | 99  |
| K       | 11.65 $\pm$ 0.13    | %                   | 9.19 $\pm$ 0.41   | 8.91 $\pm$ 0.18   | 10.35 $\pm$ 0.05  | 79                  | 86  | 89  |
| Mg      | 1.79 $\pm$ 0.05     | %                   | 1.88 $\pm$ 0.01   | 1.78 $\pm$ 0.03   | 1.79 $\pm$ 0.01   | 105                 | 99  | 100 |
| Mn      | 0.305 $\pm$ 0.005   | %                   | 0.318 $\pm$ 0.012 | 0.304 $\pm$ 0.006 | 0.304 $\pm$ 0.009 | 104                 | 100 | 100 |
| Na      | 0.405 $\pm$ 0.007   | %                   | 0.474 $\pm$ 0.004 | 0.446 $\pm$ 0.011 | 0.416 $\pm$ 0.015 | 117                 | 110 | 103 |
| Ni      | 135 $\pm$ 2         | mg kg <sup>-1</sup> | 225 $\pm$ 2       | 218 $\pm$ 16      | 268 $\pm$ 5       | 167                 | 161 | 199 |
| Pb      | 273 $\pm$ 17        | mg kg <sup>-1</sup> | 161               | 208 $\pm$ 23      | 273 $\pm$ 91      | 59                  | 90  | 100 |
| V       | 122 $\pm$ 3         | mg kg <sup>-1</sup> | 167 $\pm$ 1       | 120 $\pm$ 1       | 125 $\pm$ 6       | 137                 | 98  | 102 |
| Zn      | 0.325 $\pm$ 0.005   | %                   | 0.323 $\pm$ 0.029 | 0.332 $\pm$ 0.003 | 0.325 $\pm$ 0.008 | 99                  | 102 | 100 |

nd: not detected

**Table S3.** Dolomitic limestone (SRM 88b) analysis results (mean  $\pm$  standard deviation for 3 replicates); US: ultrasonic assisted extraction, MAD: microwave assisted digestion, MP: heating on metallic plate.

| Element | Certified           | Unit                | Found               |                     |                      | Average Recovery, % |     |     |
|---------|---------------------|---------------------|---------------------|---------------------|----------------------|---------------------|-----|-----|
|         |                     |                     | US                  | MW                  | MP                   | US                  | MW  | MP  |
| Al      | 0.178 $\pm$ 0.007   | %                   | 0.151 $\pm$ 0.003   | 0.174 $\pm$ 0.002   | 0.047 $\pm$ 0.002    | 85                  | 98  | 27  |
| Co      | (1) <sup>a</sup>    | mg kg <sup>-1</sup> | < LOQ               | < LOQ               | < LOQ                | -                   | -   | -   |
| Ca      | 21.40 $\pm$ 0.04    | %                   | 19.50 $\pm$ 0.08    | 21.90 $\pm$ 0.06    | 18.90 $\pm$ 0.10     | 91                  | 102 | 88  |
| Cr      | (2.3) <sup>a</sup>  | mg kg <sup>-1</sup> | 2.5 $\pm$ 0.2       | 2.2 $\pm$ 0.1       | 2.7 $\pm$ 0.5        | 108                 | 97  | 116 |
| Fe      | 0.194 $\pm$ 0.001   | %                   | 0.167 $\pm$ 0.001   | 0.196 $\pm$ 0.001   | 0.198 $\pm$ 0.003    | 86                  | 101 | 102 |
| K       | 0.0855 $\pm$ 0.0020 | %                   | 0.0908 $\pm$ 0.0038 | 0.0835 $\pm$ 0.0214 | n.d.                 | 106                 | 98  | -   |
| Mg      | 12.68 $\pm$ 0.04    | %                   | 12.34 $\pm$ 0.31    | 11.87 $\pm$ 0.24    | 12.78 $\pm$ 0.28     | 97                  | 94  | 101 |
| Mn      | 0.0124 $\pm$ 0.0009 | %                   | 0.0125 $\pm$ 0.0003 | 0.0127 $\pm$ 0.0002 | 0.0125 $\pm$ 0.0001  | 101                 | 102 | 101 |
| Na      | 0.0215 $\pm$ 0.0005 | %                   | 0.0232 $\pm$ 0.0051 | 0.0270 $\pm$ 0.0108 | 0.0259 $\pm$ 0.0051  | 108                 | 116 | 121 |
| Sr      | 0.0064 $\pm$ 0.0002 | %                   | 0.0064 $\pm$ 0.0002 | 0.0062 $\pm$ 0.0001 | 0.0065 $\pm$ 0.00002 | 100                 | 98  | 101 |

a: informed value; LOQ: limit of quantification (see Table 3)

**Table S4.** Phosphate rock (SRM 694) analysis results (mean  $\pm$  standard deviation for 3 replicates); US: ultrasonic assisted extraction, MW: microwave assisted digestion, MAD: heating on metallic plate.

| Analyte | Certified            | Unit | Found               |                     |                     | Average Recovery, % |     |     |
|---------|----------------------|------|---------------------|---------------------|---------------------|---------------------|-----|-----|
|         |                      |      | US                  | MW                  | MP                  | US                  | MW  | MP  |
| Al      | 0.95 $\pm$ 0.05      | %    | 0.77 $\pm$ 0.004    | 0.93 $\pm$ 0.008    | 0.88 $\pm$ 0.03     | 81                  | 98  | 93  |
| Cd      | 0.0131 $\pm$ 0.0026  | %    | 0.0135 $\pm$ 0.0006 | 0.0128 $\pm$ 0.0004 | 0.0128 $\pm$ 0.0001 | 103                 | 98  | 98  |
| Ca      | 31.14 $\pm$ 0.29     | %    | 29.58 $\pm$ 0.70    | 30.83 $\pm$ 0.50    | 27.71 $\pm$ 1.12    | 95                  | 99  | 89  |
| Cr      | (0.068) <sup>a</sup> | %    | 0.086 $\pm$ 0.002   | 0.087 $\pm$ 0.003   | 0.077 $\pm$ 0.002   | 127                 | 127 | 114 |
| Fe      | 0.552 $\pm$ 0.042    | %    | 0.492 $\pm$ 0.008   | 0.545 $\pm$ 0.022   | 0.550 $\pm$ 0.002   | 89                  | 99  | 100 |
| K       | 0.423 $\pm$ 0.017    | %    | 0.492 $\pm$ 0.034   | 0.434 $\pm$ 0.017   | 0.345 $\pm$ 0.003   | 116                 | 102 | 82  |
| Mg      | 0.199 $\pm$ 0.012    | %    | 0.200 $\pm$ 0.003   | 0.198 $\pm$ 0.002   | 0.202 $\pm$ 0.001   | 101                 | 99  | 102 |
| Mn      | 0.0090 $\pm$ 0.0009  | %    | 0.0091 $\pm$ 0.0005 | 0.0089 $\pm$ 0.0002 | 0.0087 $\pm$ 0.0006 | 101                 | 99  | 97  |
| Na      | 0.64 $\pm$ 0.03      | %    | 0.63 $\pm$ 0.02     | 0.67 $\pm$ 0.01     | 0.65 $\pm$ 0.005    | 98                  | 105 | 102 |
| V       | 0.164 $\pm$ 0.039    | %    | 0.168 $\pm$ 0.006   | 0.167 $\pm$ 0.004   | 0.160 $\pm$ 0.001   | 102                 | 102 | 97  |
| Zn      | 0.153 <sup>a</sup>   | %    | 0.148 $\pm$ 0.004   | 0.155 $\pm$ 0.007   | 0.157 $\pm$ 0.001   | 97                  | 102 | 102 |

a: informed value
